# Supplementary material
Source: Springer Nature journal article supplement (https://www.springermedizin.de/resource/supplementary/12885_2013_4620_MOESM4_ESM.pdf/9466918)
Supplement: MOESM4 [file 9466918]

□ Total CTCs ■ CTCs with PIK3CA Mutation

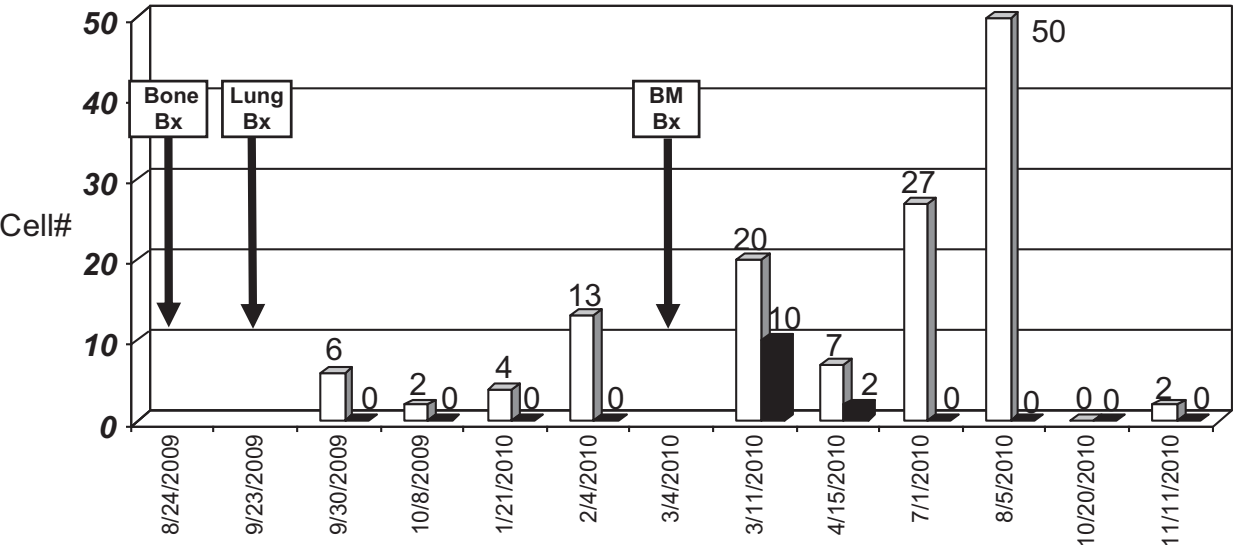

|            |           |             |                  |                                      |
|------------|-----------|-------------|------------------|--------------------------------------|
| Exemestane | Tamoxifen | Fulvestrant | Cyclophosphamide | Capecitabine and RAD001 (everolimus) |
|------------|-----------|-------------|------------------|--------------------------------------|
